# Supplementary material for: Comparing the spatial patterns of climate change in the 9 th and 5 th millennia B.P. from TRACE-21 model simulations
Source: Copernicus journal article supplement (doi:10.5194/cp-2018-132), 2018-10-11
Supplement: Supplementary file [file cp-2018-132-AC4-supplement.pdf]

1 **Comparing the spatial patterns of climate change in the 9<sup>th</sup> and 5<sup>th</sup> millennia B.P. from**  
2 **TRACE-21 model simulations**

3

4 **Liang Ning<sup>1,2,3</sup>, Jian Liu<sup>1,2\*</sup>, Raymond S. Bradley<sup>3</sup>, and Mi Yan<sup>1,2</sup>**

5 <sup>1</sup>Key Laboratory of Virtual Geographic Environment, Ministry of Education; State key Laboratory  
6 of Geographical Environment Evolution, Jiangsu Provincial Cultivation Base; School of  
7 Geographical Science, Nanjing Normal University, Nanjing, 210023, China

8 <sup>2</sup>Jiangsu Center for Collaborative Innovation in Geographical Information Resource Development  
9 and Application, Nanjing, 210023, China

10 <sup>3</sup>Climate System Research Center, Department of Geosciences, University of Massachusetts,  
11 Amherst, 01003, United States

12 \*jliu@njnu.edu.cn

13

14 **ABSTRACT**

15 The spatial patterns of global temperature and precipitation changes, as well as corresponding  
16 large-scale circulation patterns during the latter part of the 9<sup>th</sup> and 5<sup>th</sup> millennia B.P. (4800-4500  
17 versus 4500-4000 years B.P. and 9200-8800 versus 8800-8000 years B.P.) are compared through  
18 a group of transient simulations using the Community Climate System Model version 3 (CCSM3).  
19 Both periods are characterized by significant sea surface temperature decreases over the North  
20 Atlantic south of Iceland. Temperatures were also colder across the northern hemisphere, but  
21 warmer in the southern hemisphere. Significant precipitation decreases are seen over most of the  
22 northern hemisphere, especially over Eurasia and the Asian monsoon regions, indicating a weaker  
23 summer monsoon. Large precipitation anomalies over northern South America and adjacent ocean  
24 regions are related to a southward displacement of the Inter Tropical Convergence Zone (ITCZ)  
25 in that region. Climate changes in the late 9<sup>th</sup> millennium B.P. (“The 8.2ka BP event”) are widely  
26 considered to have been caused by a large fresh water discharge into the northern Atlantic, which  
27 is confirmed in a meltwater forcing sensitivity experiment, but this was not the cause of changes  
28 occurring between the early and latter half of the 5<sup>th</sup> millennium B.P. Model simulations suggest  
29 that a combination of factors, led by long-term changes in insolation, drove a steady decline in  
30 SSTs across the North Atlantic and a reduction in the AMOC, over the past 4500 years, with  
31 associated teleconnections across the globe, leading to drought in some areas. Multi-century scale

32 fluctuations in SSTs and AMOC strength were superimposed on this decline. This helps explain  
33 the onset of neoglaciation around 5000–4500 BP, followed by a series of neoglacial advances and  
34 retreats during recent millennia. The “4.2ka B.P. event” appears to have been one of several late  
35 Holocene multi-century fluctuations that were embedded in the long-term, low frequency change  
36 in climate that occurred after ~4.8 ka BP. Whether these multi-century fluctuations were a  
37 response to internal centennial-scale ocean-atmosphere variability or external forcing (such as  
38 explosive volcanic eruptions and associated feedbacks) or a combination of such conditions, is not  
39 known and requires further study.

40

## 41 **1. Introduction**

42 It is well-documented that the first order driver of Holocene climate change was orbital forcing,  
43 with an overall decline in summer insolation in summer months, particularly at high latitudes. This  
44 led to a drop in temperatures at high latitudes and less rainfall throughout the monsoon regions of  
45 the northern hemisphere, as seen in many paleoclimatic records (Burns, 2011; Solomina et al.,  
46 2015). Shorter-term rainfall fluctuations superimposed on this long-term change in hydrological  
47 conditions are clearly seen in many speleothem and lacustrine sediment records (e.g. Wang et al.,  
48 2005; Kathayat et al., 2017). Abrupt hydrological changes around 4.2 ka BP have been  
49 documented for various regions of the world; it has been suggested that the major global monsoon  
50 and ocean-atmosphere circulation systems were deflected or weakened synchronously at this time,  
51 causing major century-scale precipitation disruptions (severe megadroughts) over different regions  
52 (Weiss, 2017). Other studies (Wang et al., 2005; Tan et al., 2018a) have also noted weakening of  
53 the Asian summer monsoon at around this time, resulting in drought over the northern part of  
54 eastern China and flooding over the southern part.

55 In recent years, a more comprehensive picture of the “4.2 ka BP event” has been derived  
56 from analysis of new high-resolution proxy data from different regions, and the event has become  
57 the focus of symposia and research conferences (e.g. Weiss, 2015). This event is of particular  
58 interest as it is associated with societal collapse and regional abandonment in many different  
59 regions. For example, the collapse and abandonment of Akkadian imperial settlements in the  
60 Khabur Plains, and other communities in dry farming domains across the Aegean and West Asia,  
61 was in response to the abrupt nature with which the megadrought began (with its onset in less than

62 five years), its magnitude (a precipitation reduction of 30-50%) and its long duration (200-300  
63 years) (Weiss, 2017).

64 Although a drought episode around 4.2ka B.P. has been found in many proxy  
65 reconstructions, the mechanisms that brought this about are still unclear, though different  
66 hypotheses have been proposed. For example, Staubwasser and Weiss (2006) suggested that the  
67 abrupt climate change event at 4.2ka B.P., as well as other widespread droughts around 8.2ka BP  
68 and 5.2ka BP over the eastern Mediterranean, West Asia, and the Indian subcontinent, were caused  
69 by a change in subtropical upper-level flow over the eastern Mediterranean and Asia. Some studies  
70 have suggested that these large-scale circulation anomalies may reflect persistent modes of internal  
71 climate variability, though there is a wide range of other explanations. For example, Booth et al.  
72 (2005) indicated that the widespread mid-latitude and subtropical drought around 4.2ka BP was  
73 linked to a La Niña-like SST pattern, possibly associated with amplification of this spatial mode  
74 by variations in solar irradiance or volcanism. On the other hand, Hong et al. (2005) analyzed a  
75 12,000-yr proxy record for the East Asian monsoon and concluded that such abnormal climate  
76 conditions could possibly result from frequent and severe El Niño activities. Using paired oxygen  
77 isotope records from North America, Liu et al. (2014b) indicated that there was a transition from  
78 a negative Pacific North American (PNA)-like pattern during the mid-Holocene to a positive PNA-  
79 like pattern during the late Holocene, which led to drier conditions in northwestern North America.  
80 A similar conclusion was reached by Finkenbinder et al. (2016) based on lake sediment records  
81 from Newfoundland. They argued that this transition took place around 4.3ka B.P., leading to  
82 wetter conditions across the Newfoundland region. In contrast, Bond et al. (2001) argued that  
83 North Atlantic SST anomalies around 4.2ka B.P. were related to a negative North Atlantic  
84 Oscillation (NAO) pattern, linked to solar forcing. Deininger et al. (2017) also found that changes  
85 in the atmospheric circulation associated with northward and southward propagating westerlies  
86 (similar to the NAO but on a millennial instead of a decadal scale) could be a possible driver of  
87 coherency and cyclicity during the last 4.5ka BP, as seen in multiple speleothem  $\delta^{18}\text{O}$  records that  
88 span most of the European continent. Thus, although there have been many suggested mechanisms,  
89 the ultimate drivers for climatic anomalies at 4.2ka B.P. remain unclear.

90 Wang (2009a) reviewed studies of Holocene cold events, and concluded that the most  
91 severe Holocene cold event, at ~8.2ka BP, was brought about by an outburst flood from pro-glacial  
92 Lake Agassiz. This large volume of freshwater drained into the North Atlantic extremely rapidly,

93 leading to a brief reorganization of the North Atlantic Meridional Overturning Circulation  
94 (AMOC) and a southward displacement of the ITCZ, resulting in dry conditions over many regions  
95 (Barber et al., 1999; Bianchi and McCave, 1999; Risebrobakken et al., 2003; McManus et al.,  
96 2004; Clarke et al., 2004). Potential external forcing factors for the 4.2ka BP event include non-  
97 linear responses to Milankovitch forcing, solar irradiance variations, and explosive volcanic  
98 eruptions, all of which may have brought about variations in the ocean-atmosphere system (Booth  
99 et al., 2005). Wang (2009a) concluded that solar irradiance minima were the main cause of cold  
100 events in the mid- to late Holocene (including the 4.2ka BP event) and that internal oscillations  
101 within the climate system could possibly have intensified these cold events under certain  
102 circumstances (Wang, 2009b).

103 In summary, the 8.2ka BP event and corresponding southward shift in the ITCZ were  
104 caused by glacial flooding of the North Atlantic and this can be reasonably simulated by coupled  
105 GCMs with different boundary conditions and freshwater forcing (Alley and Agustsdottir, 2005;  
106 LeGrande et al., 2006). By contrast, the forcing mechanisms that brought about the 4.2ka BP event  
107 are currently uncertain. At 4.2ka B.P., the major global monsoon and ocean-atmosphere circulation  
108 systems may have been deflected or weakened synchronously, causing major century-scale  
109 precipitation disruptions, with severe megadroughts over many different regions (Weiss, 2017).  
110 As GCM simulations of the 4.2ka BP event have not received much attention, in this study, the  
111 spatial patterns and corresponding mechanisms relevant to the 4.2 ka BP event are examined and  
112 compared to those associated with the 8.2ka BP event.

113

## 114 **2. Data and methodology**

115 Simulations of the last 21ka (TRACE-21) were used in this study (He, 2011; He et al. 2013; Wen  
116 et al., 2016). These transient simulations have been completed using Version 3 of the Community  
117 Climate System Model (CCSM3), which is a coupled atmosphere-ocean general circulation model  
118 developed by the National Center for Atmospheric Research (NCAR). The atmosphere model in  
119 the CCSM3 is the Community Atmospheric Model 3 (CAM3) with a horizontal resolution of  
120  $\sim 3.75^\circ$  (T31), and the ocean model is the Parallel Ocean Program (POP) with a longitudinal  
121 resolution of  $3.6^\circ$  and variable latitudinal resolution.

122 The “full-forcing” TRACE-21 simulation includes changes in orbital parameters, greenhouse  
123 gases, ice extent (based on the ICE 5G-VM2 configurations) and meltwater fluxes from the

124 Northern Hemisphere and Antarctic ice sheets. The orbital forcing is based on transient variations  
125 of orbital configuration (Berger, 1978). The concentrations of greenhouse gases were adopted from  
126 Joos and Spahni (2008). The ice sheet data were modified from the reconstruction of Peltier (2004)  
127 and the meltwater scheme was adopted from Liu et al. (2009).

128 Simulations in which only one of these factors was included have also been carried out and are  
129 available in the TRACE-21 archive (Otto-Bliesner et al., 2006; Wen et al., 2016). These  
130 simulations can reproduce the timing and magnitude of many aspects of climate evolution during  
131 the last 21 ka, such as changes in sea surface temperature (SST) (He et al., 2013). However, there  
132 are significant differences between the rate of temperature change in the model during the early  
133 Holocene and many paleoclimatic records (Liu et al., 2014a; Marcott et al., 2013; Marsicek et al.,  
134 2018). In this study, we do not address this enigma, but use the transient model data to compare  
135 intervals within the Holocene when abrupt changes in climate are known to have occurred in some  
136 regions (~8.2ka B.P. and ~4.2ka B.P.). These times were recently adopted by the International  
137 Commission on Stratigraphy as the chronological boundaries of the early, mid and late Holocene  
138 (Walker et al., 2012, 2018).

139 We examine mean annual surface temperature, annual precipitation and SSTs from the full-  
140 forcing experiment, and also AMOC strength, defined as the maximum Atlantic stream function  
141 between 20-50°N between 500m and 5000m depth (Ottera et al., 2010) from the full-forcing and  
142 orbital-forcing experiments.

143

### 144 **3. Results**

145 First, we assess Holocene climate variability as simulated in the full-forcing experiment. Fig. 1  
146 shows the time series of surface temperature and precipitation over the last past 13ka. It shows  
147 cooling associated with the Younger Dryas, followed by Holocene warming, but also a brief  
148 cooling episode from ~8500-8000 B.P. Thereafter the record exhibits strong multi-century scale  
149 variability. Temperature and precipitation are positively correlated at this global scale. It is  
150 tempting to associate the colder episodes with those identified by Wanner et al (2011) or by Bond  
151 et al. (2001) but only a few of these are coincident in time.

152 The period 4.5ka-4.0ka BP was chosen for analysis, by subtracting the mean annual 2m air  
153 temperatures, SSTs and precipitation of the period 4500-4000 years B.P. from the preceding period  
154 (4800-4500 years B.P.). The spatial distribution of air temperature (Fig. 2a) shows that

155 temperatures were significantly colder over most of the extra-tropical northern hemisphere, but  
156 generally warmer in the Tropics and in the southern hemisphere. The main exceptions are northern  
157 South America, which was cooler, and northern India and Pakistan, which were significantly  
158 warmer. Precipitation decreased over almost all of the northern hemisphere, particularly in the  
159 Tropics where the ITCZ shifted southward, mainly over South America and adjacent ocean  
160 regions, resulting in higher rainfall in the 0-20°S zonal band from 4500-4000 years B.P. (Figure  
161 2b). There was less precipitation over the northern part of China but more precipitation over  
162 southern China, consistent with paleoclimate reconstructions that indicate a weaker East Asian  
163 monsoon (Wang et al., 2005; Tan et al., 2018a). This pattern is also similar to the situation during  
164 the LIA in China and some of the megadroughts that have happened in recent centuries (Cook et  
165 al., 2010; Tan et al., 2018b). Over other Asian monsoon regions, such as India, there were also  
166 significant precipitation reductions during the second half of the 5<sup>th</sup> millennium B.P., consistent  
167 with speleothem records that show a decline in Indian summer monsoon rainfall over this period  
168 (Kathayat et al., 2017). Over Central America and the northern edge of South America, conditions  
169 were also drier in the later period, but over the rest of South America, and adjacent ocean regions,  
170 precipitation was higher, due to a southward displacement of the ITCZ; this pattern is supported  
171 by speleothem records of rainfall in Mexico and Brazil (Lachniet et al., 2013; Bernal et al., 2016).  
172 The SST pattern shows significantly cooler temperatures in the period 4500-4000years B.P. over  
173 the North Atlantic. This cooling is centered around 50°N (south of Iceland) and extends into the  
174 sub-Tropics on the eastern side of the sub-tropical gyre. Slightly cooler temperatures are also  
175 found over the North Pacific (Fig. 2c). By contrast, for most of the southern hemisphere there was  
176 a positive change in temperature. Rotated EOF analysis on the global SST field shows the primary  
177 feature (in EOFs 1 and 2) to be the cooler SSTs over the North Atlantic, with a shift around 4.5ka  
178 BP from a predominantly positive to a generally negative pattern (Fig. 3). This is similar to an  
179 AMO-like pattern over the northern Atlantic that has been identified in both instrumental and  
180 paleoclimatic records (Delworth and Mann, 2000; Knudsen et al., 2011).

181         The same evaluation of changes in the 9<sup>th</sup> millennium B.P. was made by subtracting the  
182 mean annual 2m air temperatures, SSTs and precipitation from 8800-8000 from the preceding  
183 period (9200-8800 years B.P.), since an abrupt change in temperature in the model occurred around  
184 8.8 ka BP (Fig. 1a). Air temperatures were significantly lower in the second period over most of  
185 the northern hemisphere; only a zone from northern South America across to sub-Saharan Africa

186 and India was warmer in the second period (Fig. 4a). Almost the entire southern hemisphere was  
187 warmer. Precipitation was less in the second period across all of the northern hemisphere,  
188 especially along the ITCZ, which was displaced to the south. This resulted in increased rainfall in  
189 a belt south of the Equator, across almost all of the Tropics (Fig. 4b). The rest of the southern  
190 hemisphere was also slightly wetter. SSTs show a strong pattern of cooling over the North Pacific,  
191 and the eastern North Atlantic, south of Iceland, extending around the Atlantic sub-tropical gyre  
192 into the tropical Atlantic and Caribbean (Fig. 4c). Rotated EOFs show that the anomalies in the  
193 North Atlantic and North Pacific dominate the first 3 EOFs (Fig. 5).

194 The spatial patterns of temperature changes, precipitation changes, and SST changes were  
195 remarkably similar in the late 9<sup>th</sup> millennium and in the period leading up to the late 5<sup>th</sup> millennium  
196 (Fig. 6). The major difference (Fig. 6a) is that SST changes over the subtropical Atlantic were  
197 greater, and the related changes across the northern hemisphere in the 9<sup>th</sup> millennium B.P. were  
198 larger, than in the late 5<sup>th</sup> millennium. Similarly, the major changes in precipitation patterns were  
199 comparable, but less pronounced from 4500-4000 years B.P. These similarities are somewhat  
200 puzzling as the meltwater forcing sensitivity experiment clearly shows that the “8.2ka BP event”  
201 was induced by a massive freshwater flux into the Atlantic whereas (as far as we know) no  
202 comparable meltwater event occurred in the late Holocene so it seems unlikely that such forcing  
203 was a factor driving the changes seen in the model output for 4500-4000 years B.P.

204

#### 205 **4. Discussion and Conclusions**

206 Paleoclimate records have shown that unusually dry conditions persisted for several centuries  
207 around 4.2ka BP over many regions, and in some areas these had devastating societal impacts. In  
208 this study, the spatial patterns of temperature, precipitation, and corresponding circulation  
209 anomalies during the latter part of the 9<sup>th</sup> and 5<sup>th</sup> millennia B.P. (4800-4500 versus 4500-4000  
210 years B.P. and 9200-8800 versus 8800-8000 years B.P.) were compared based on model  
211 simulations. The changes in climate during both periods were similar and characterized by  
212 significant temperature and precipitation decreases over most of the northern hemisphere, whereas  
213 the southern hemisphere was slightly warmer and wetter. In particular, the ITCZ was displaced to  
214 the south across much of the globe, and monsoon regions of the northern hemisphere were  
215 generally drier. On a regional scale, there was less precipitation over the northern part of China  
216 but more precipitation over southern China, indicating a reduced eastern Asian summer monsoon.

217 It is clear that the earlier period was strongly influenced by freshwater forcing in the North  
218 Atlantic, which drastically reduced the Atlantic Meridional Overturning Circulation (AMOC). The  
219 similarity in anomaly patterns between the 8.2ka BP event and the late 5<sup>th</sup> millennium BP suggests  
220 that there was also disruption to the AMOC in the later period. However, as there was no  
221 comparable freshwater forcing in the 5<sup>th</sup> millennium B.P., we must therefore consider what other  
222 factors might have played a role in reducing AMOC strength. There were no major solar irradiance  
223 changes at that time, so we can rule that out as a forcing factor. However, there was a major  
224 eruption of the Icelandic volcano Hekla at ~4200 BP, and it is possible that such an event could  
225 have brought about regional cooling, leading to more extensive, thick sea-ice and attendant  
226 freshwater effects on the AMOC (cf. Moreno-Chamarro et al., 2017). This mechanism deserves  
227 further scrutiny.

228 In the “all forcing” TRACE-21 simulation, AMOC strength declined slightly during the late  
229 Holocene and underwent multi-century fluctuations (Fig. 7a), which were strongly correlated with  
230 SSTs in the region of the North Atlantic where cooling was so prominent from 4.5-4.0 ka B.P.  
231 (Fig. 8). Mean SSTs in this region over the last 4500 years of the model simulation stayed below  
232 the 4.8-4.5 ka B.P. average for ~69% of the time (Fig. 8), and AMOC strength was similarly below  
233 the 4.8-4.5 ka BP mean for 63% of the time (Fig. 7a). One of these fluctuations was associated  
234 with an AMOC minima around 4.2ka BP. In the TRACE-21 model simulation with only orbital  
235 forcing, AMOC strength reached its Holocene maximum around 4.8 ka BP, then slightly weakened  
236 (by ~10%) over the late Holocene, staying below the 4.8-4.5ka BP mean for 87% of the time, with  
237 minor multi-century variations superimposed on the long-term downward trend (Fig. 7b). This  
238 suggests that a combination of factors, led by long-term changes in insolation, drove a steady  
239 decline in SSTs across the North Atlantic and a reduction in the AMOC, with associated  
240 teleconnections across the globe (including drought in some regions). Minor fluctuations around  
241 this declining trend were the dominant pattern for most of the last 4500 years. This interpretation  
242 helps explain widespread paleoclimatic evidence for the onset of neoglaciation around 5000-4500  
243 BP, followed by a series of neoglacial advances and retreats during recent millennia (Porter, 2000;  
244 Barclay et al., 2009; Solomina et al., 2015; Bradley and Bakke, 2018). Since the onset of  
245 neoglaciation early in the 5<sup>th</sup> millennium B.P., mountain glaciers fluctuated in extent but did not  
246 entirely disappear, indicating that a distinctly different climate state prevailed compared to the  
247 period prior to ~5 ka B.P., when many mountain regions were ice-free.



248 We therefore conclude from the model simulations that the “4.2ka B.P. event” was one of  
249 several late Holocene multi-century fluctuations that were embedded in a long-term, low frequency  
250 change in climate that occurred after ~4.8 ka BP. World-wide climatic anomalies during these  
251 fluctuations were driven by changes in the strength of the AMOC and related teleconnections.  
252 Whether such multi-century fluctuations were a response to internal centennial-scale ocean-  
253 atmosphere variability (cf Min and Liu, 2018), or external forcing (such as explosive volcanic  
254 eruptions and associated feedbacks) or a combination of such conditions, is not known. Further  
255 studies of the role of both external forcing and internal variability are needed to provide a better  
256 understanding of such mechanisms (cf. Ottera et al., 2010; Moreno-Chamarro et al., 2017; Gupta  
257 and Marshall, 2018).

258

### 259 **Acknowledgements**

260 This research was jointly supported by the National Key Research and Development Program of  
261 China (Grant No.2016YFA0600401), the National Natural Science Foundation of China (Grant  
262 No. 41501210, Grant No. 41420104002, Grant No. 41671197, and Grant No. 41631175), the  
263 Jiangsu Province Natural Science Foundation (Grant No. BK20150977), Top-notch Academic  
264 Programs Project of Jiangsu Higher Education Institutions (Grant No. PPZY2015B115), and the  
265 Priority Academic Development Program of Jiangsu Higher Education Institutions (Grant No.  
266 164320H116). Support was also received from U.S. NSF grant PLR-1417667 to the University of  
267 Massachusetts. TraCE-21ka was made possible by the DOE INCITE computing program, and  
268 supported by NCAR, the NSF P2C2 program, and the DOE Abrupt Change and EaSM programs.

269

### 270 **References:**

- 271 Alley, R.B., and Agustsdottir, A.M.: The 8k event: cause and consequences of a major Holocene  
272 abrupt climate change. *Quaternary Science Reviews*, 24, 1123–1149, 2005.
- 273 Barber, D.C., Dyke, A., Hillaire-Marcel, C., Jennings, A.E., Andrews, J.T., Kerwin, M.W.,  
274 Bilodeau, G., McNeely, R., Southon, J., Morehead, M.D. and Gagnon, J.M.: Forcing of the cold  
275 event of 8,200 years ago by catastrophic drainage of Laurentide lakes. *Nature*, 400 (6742), 344-  
276 348, 1999.
- 277 Barclay, D.J., Wiles, G.C. and Calkin, P.E.: Holocene glacier fluctuations in Alaska. *Quaternary*  
278 *Science Reviews*, 28 (21-22), 2034-2048, 2009.

279 Berger, A. L. Long-term variations of daily insolation and Quaternary climatic changes. *J. Atmos.*  
280 *Sci.* 35, 2362–2367, 1978.

281 Bernal, J.P., Cruz, F.W., Stríkis, N.M., Wang, X., Deininger, M., Catunda, M.C.A., Ortega-  
282 Obregón, C., Cheng, H., Edwards, R.L. and Auler, A.S.: High-resolution Holocene South  
283 American monsoon history recorded by a speleothem from Botuverá Cave, Brazil. *Earth and*  
284 *Planetary Science Letters*, 450, 186-196, 2016.

285 Bianchi, G., and McCave, I.N.: Holocene periodicity in north Atlantic climate and deep ocean flow  
286 south of Iceland. *Nature*, 397, 515–518, 1999.

287 Bond, G., Kromer, B., Beer, J., Muscheler, R., Evans, M.N., Showers, W., Hoffmann, S., Lotti-  
288 bond, R., Hajdas, I. and Bonani, G.: Persistent solar influence on North Atlantic climate during  
289 the Holocene. *Science*, 294, 2130-2136, 2001.

290 Booth, R. K., Jackson, S. T., Forman, S. L., Kutzbach, J. E., Bettis III, E. A., Kreig, J., and Wright,  
291 D. K.: A severe centennial-scale drought in mid-continental North America 4200 years ago and  
292 apparent global linkage. *The Holocene*, 15, 321-328, 2005.

293 Bradley, R.S. and Bakke, J., Is there evidence for a 4.2ka BP event in the northern North Atlantic  
294 region? *Climate of the Past Discussions* (in review), 2018.

295 Burns, S.J.: Speleothem records of changes in tropical hydrology over the Holocene and possible  
296 implications for atmospheric methane. *The Holocene*, 21, 735-741, 2011.

297 Clarke, G.K.C., Leverington, D.W., Teller, J.T., and Dyke, A.S.: Paleohydraulics of the last  
298 outburst flood from glacial Lake Agassiz and the 8200 BP cold event. *Quaternary Science*  
299 *Reviews*, 23, 389–407, 2004.

300 Cook, E. R., Anchukaitis, K. J., Buckley, B. M., D’Arrigo, R. D., Jacoby, G. C., and Wright, W.  
301 E.: Asian monsoon failure and megadrought during the last millennium. *Science*, 328, 486-489,  
302 2010.

303 Deininger, M., McDermott, F., Mudelsee, M., Werner, M., Frank, N., Mangini, A.: Coherency of  
304 late Holocene European speleothem  $\delta^{18}\text{O}$  records linked to North Atlantic Ocean circulation.  
305 *Climate Dynamics*, 49, 595-618, 2017.

306 Delworth, T.L. and Mann, M.E.: Observed and simulated multidecadal variability in the Northern  
307 Hemisphere, *Climate Dynamics*, 16, 661-676, 2000.

308 Finkenbinder, M. S., Abbott, M. B., and Steinman, B. A.: Holocene climate change in  
309 Newfoundland reconstructed using oxygen isotope analysis of lake sediment cores. *Global and*

310 *Planetary Change*, 143, 251-261, 2016.

311 Gupta, M. and Marshall, J.: The climate response to multiple volcanic eruptions mediated by  
312 ocean heat uptake: damping processes and accumulation potential. *J. Climate*, 31, 8669-8687,  
313 2018.

314 He, F.: *Simulation transient climate evolution of the last deglaciation with CCSM3*. PhD  
315 dissertation, University of Wisconsin-Madison, 185pp, 2011.

316 He, F., Shakun, J. D., Clark, P. U., Carlson, A. E., Liu, Z., Otto-Bliesner, B. L., and Kutzbach J.  
317 E.: Northern Hemisphere forcing of Southern Hemisphere climate during the last deglaciation.  
318 *Nature*, 494, 81-85, 2013.

319 Joos, F., and Spahni, R.: Rates of change in natural and anthropogenic radiative forcing over the  
320 past 20,000 years, *Proceedings of the National Academy of Sciences*, 105, 1425-1430, doi:  
321 10.1073/pnas.0707386105, 2008.

322 Kathayat, G., Cheng, H., Sinha, A., Yi, L., Li, X., Zhang, H., Li, H., Ning, Y. and Edwards, R.L.:  
323 The Indian monsoon variability and civilization changes in the Indian subcontinent. *Science*  
324 *Advances*, 3, e1701296, 2017.

325 Knudsen, M.F., Seidenkrantz, M.S., Jacobsen, B.H. and Kuijpers, A.: Tracking the Atlantic  
326 Multidecadal Oscillation through the last 8,000 years. *Nature Communications*, 2, 178-185,  
327 2011.

328 Lachniet, M.S., Asmerom, Y., Bernal, J.P., Polyak, V.J. and Vazquez-Selem, L.: Orbital pacing  
329 and ocean circulation-induced collapses of the Mesoamerican monsoon over the past 22,000 y.  
330 *Proceedings of the National Academy of Sciences*, 110, 9255-9260, 2013.

331 LeGrande, A.N., Schmidt, G.A., Shindell, D.T., Field, C.V., Miller, R.L., Koch, D.M., Faluvegi,  
332 G. and Hoffmann, G.: Consistent simulations of multiple proxy responses to an abrupt climate  
333 change event. *Proceedings of the National Academy of Sciences*, 103, 837–842, 2006.

334 Liu, Z., Otto-Bliesner, B.L., He, F., Brady, E.C., Tomas, R., Clark, P.U., Carlson, A.E., Lynch-  
335 Stieglitz, J., Curry, W., Brook, E. and Erickson, D.: Transient simulation of last deglaciation  
336 with a new mechanism for Bølling-Allerød warming. *Science*, 325 (5938), 310-314, 2009.

337 Liu, Z., Zhu, J., Rosenthal, Y., Zhang, X., Otto-Bliesner, B.L., Timmermann, A., Smith, R.S.,  
338 Lohmann, G., Zheng, W. and Timm, O.E.: The Holocene temperature conundrum. *Proceedings*  
339 *of the National Academy of Sciences*, 111, E3501-E3505, 2014a.

340 Liu, Z., Yoshimura, K., Bowen, G. J., Buening, N. H., Risi, C., Welker, J. M., and Yuan, F.:

341 Paired oxygen isotope records reveal modern North American atmospheric dynamics during  
342 the Holocene. *Nature Communications*, 5, 3701, DOI: 10.1038/ncomms4701, 2014b.

343 Marsicek, J., Shuman, B.N., Bartlein, P.J., Shafer, S.L. and Brewer, S.: Reconciling divergent  
344 trends and millennial variations in Holocene temperatures. *Nature*, 554 (7690), 92-96, 2018.

345 Marcott, S.A., Shakun, J.D., Clark, P.U., and Mix, A.C.: A reconstruction of regional and global  
346 temperature for the past 11,300 years. *Science*, 339, 1198-1201, 2013.

347 McManus, J.F., Francois, R., Gherardi, J.-M., Keigwin, L. D., and Brown-Leger, S.: Collapse and  
348 rapid resumption of Atlantic meridional circulation linked to deglacial climate changes. *Nature*,  
349 428, 834–837, 2004.

350 Moreno-Chamarro, E., Zanchettin, D., Lohmann, K and Jungclaus, J.H., An abrupt weakening of  
351 the subpolar gyre as trigger of Little Ice Age-type episodes. *Climate Dynamics*, 48, 727-744,  
352 2017.

353 Ottera, O. H., Bentsen, M., Drange, H., and Suo, L.: External forcing as a metronome for Atlantic  
354 multidecadal variability. *Nature Geoscience*, 3, 688-694, 2010.

355 Otto-Bliesner, B. L., Brady, E. C., Clauzet, G., Tomas, R., Levis, S., and Kothavala, Z.: Last  
356 Glacial Maximum and Holocene climate in CCSM3. *J. Climate*, 19, 2526-2544, 2006.

357 Peltier, W. R.: Global glacial isostasy and the surface of the ice-age Earth-The ICE-5G (VM2)  
358 model and GRACE, *Annual Rev. Earth Planet. Sci.*, 32, 111-149, 2004.

359 Porter, S.C.: Onset of neoglaciation in the Southern Hemisphere. *Journal of Quaternary*  
360 *Science*, 15 (4), 395-408, 2000

361 Risebrobakken, B., Jansen, E., Andersson, C., Mjelde, E., Hevrøy, K.: A high resolution study of  
362 Holocene paleoclimatic and paleoceanographic changes in the Nordic Seas. *Paleoceanography*,  
363 18, 1–14, 2003.

364 Solomina, O.N., Bradley, R.S., Hodgson, D.A., Ivy-Ochs, S., Jomelli, V., Mackintosh, A.N.,  
365 Nesje, A., Owen, L.A., Wanner, H., Wiles, G.C. and Young, N.E.: Holocene glacier  
366 fluctuations. *Quaternary Science Reviews*, 111, 9-34, 2015.

367 Staubwasser, M., and Weiss, H.: Holocene climate and cultural evolution in late prehistoric-early  
368 historic West Asia. *Quaternary Research*, 66, 372-387, 2006.

369 Tan, L., Cai, Y., Cheng, H., Edwards, L. R., Gao, Y., Xu, H., Zhang, H., and An, Z.: Centennial-  
370 to decadal- scale monsoon precipitation variations in the upper Hanjiang River region, China  
371 over the past 6650 years. *Earth and Planetary Science Letters*, 482, 580-590, 2018a.

372 Tan, L., Cai, Y., Cheng, H., Edwards, L. R., Lan, J, Zhang, H., Li, D, Ma, L. Zhao, P. and Gao,  
373 Y.: High resolution monsoon precipitation changes on southeastern Tibetan Plateau over the  
374 past 2300 years. *Quaternary Science Reviews*, 195, 122-132, 2018b.

375 Walker, M.J., Berkelhammer, M., Björck, S., Cwynar, L.C., Fisher, D.A., Long, A.J., Lowe, J.J.,  
376 Newnham, R.M., Rasmussen, S.O. and Weiss, H.: Formal subdivision of the Holocene  
377 Series/Epoch: a Discussion Paper by a Working Group of INTIMATE (Integration of ice-core,  
378 marine and terrestrial records) and the Subcommittee on Quaternary Stratigraphy  
379 (International Commission on Stratigraphy). *Journal of Quaternary Science*, 27, 649-659,  
380 2012.

381 Walker, M.J., Berkelhammer, M., Björck, S., Cwynar, L.C., Fisher, D.A., Long, A.J., Lowe, J.J.,  
382 Newnham, R.M., Rasmussen, S.O. and Weiss, H.: Formal ratification of the subdivision of the  
383 Holocene Series/Epoch (Quaternary System/Period): two new Global Boundary Stratotype  
384 Sections and Points (GSSPs) and three new stages/subseries. *Episodes*, 41, 2018.

385 Wang, S.: Holocene climate, *Advances in climate change research*, 5, 247-248, 2009a (in Chinese  
386 with English abstract)

387 Wang, S.: Holocene cold events in the north Atlantic chronology and climatic impact, *Quaternary*  
388 *Sciences*, 29, 1146-1153, 2009b (in Chinese with English abstract)

389 Wang, Y., Cheng, H., Edwards, L. R., He, Y., Kong, X., An, Z., Wu, J., Kelly, M. J., Dykoski, C.  
390 A., and Li, X.: The Holocene Asian monsoon: links to solar changes and north Atlantic climate,  
391 *Science*, 308, 854-857, 2005.

392 Weiss, H.: Megadrought, collapse, and resilience in late 3<sup>rd</sup> millennium BC Mesopotamia. In :  
393 Meller, H., Arz, H. W., Jung, R., and Risch, R., eds, 2200 BC – *A climatic breakdown as a*  
394 *cause for collapse of the Old World?* Halle: Landesmuseum fur Vorgeschichte, 35-52, 2015.

395 Weiss, H.: 4.2ka BP megadrought and the Akkadian collapse. In: Weiss, H., ed., *Megadrought*  
396 *and Collapse*, Oxford University Press, 93-159, 2017.

397 Wen, X, Liu, Z, Wang, S. Cheng, J. and Zhu, J.: Correlation and anti-correlation of the East Asian  
398 summer and winter monsoons during the last 21,000 years. *Nature Communications*, 7,  
399 11999, 2016.

400 Yan, M and Liu, J., Physical processes of cooling and megadrought in 4.2ka BP event: results from  
401 TRACE-21 simulations. *Climate of the Past Discussions* (in review), 2018

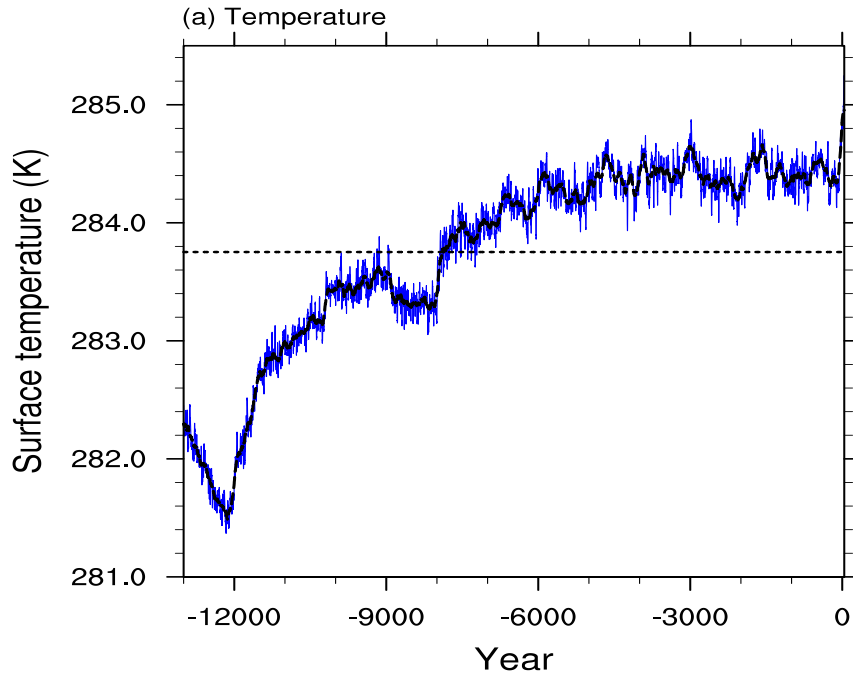

402

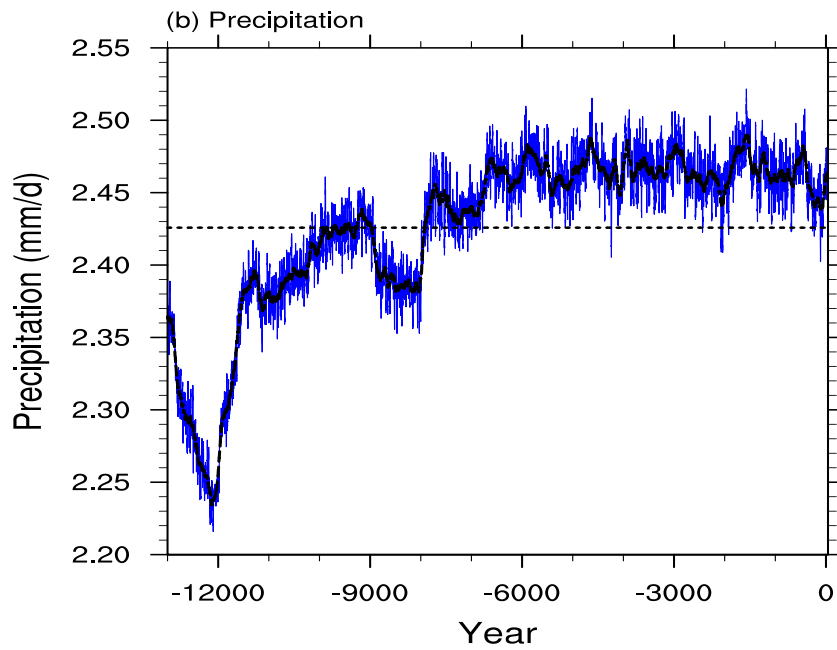

403

404

405

406 **Figure 1.** (a) Northern hemisphere average surface temperature and (b) precipitation over the last  
 407 13ka years from the all-forcing experiment. Blue line is the 10-year running average and the black  
 408 line is the 100-year running average. The black dash line shows the average of the time series.

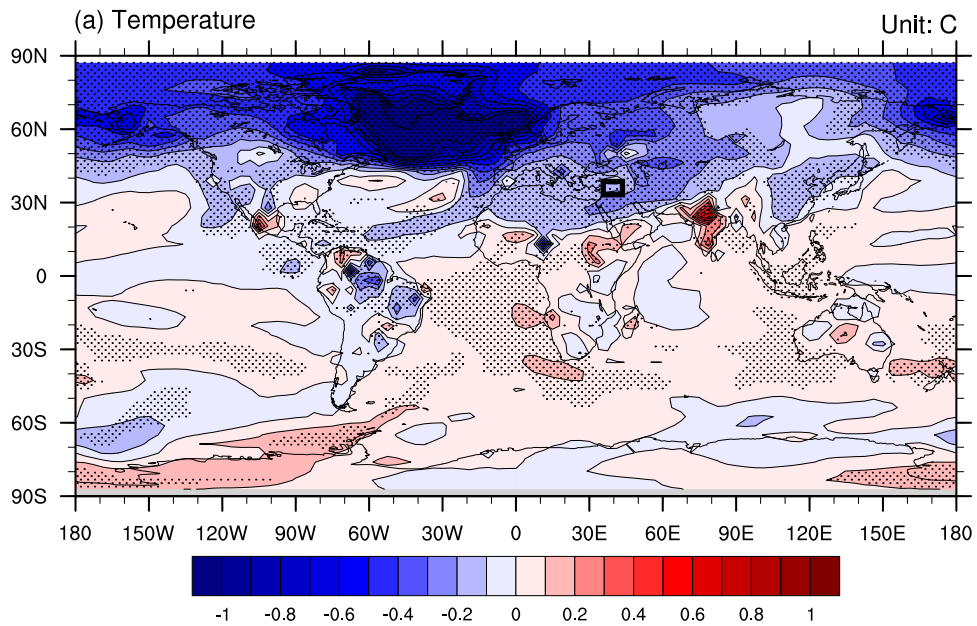

409  
410  
411  
412  
413  
414  
415  
416  
417  
418  
419  
420  
421  
422  
423  
424  
425  
426  
427  
428  
429  
430  
431  
432  
433  
434  
435

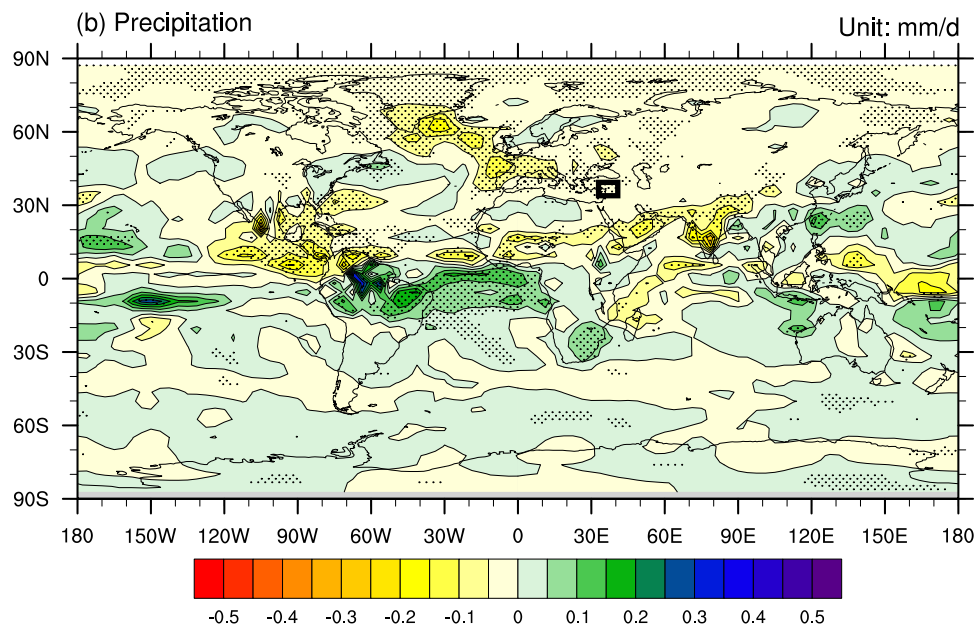

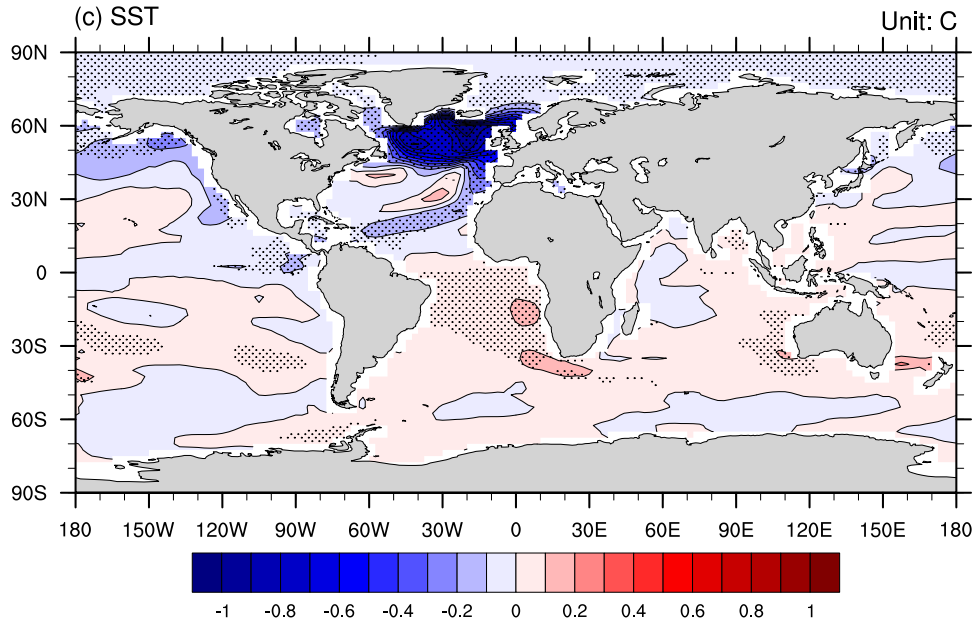

436  
437

438 **Figure 2.** The changes of (a) surface temperature (°C), (b) precipitation (mm/day), and (c) SST  
 439 (°C) after 4.5ka BP (between 4500-4000ka BP and 4800-4500ka BP). The rectangles in (a) and (b)  
 440 indicate the region with major dry-farming settlement abandonment around 4.2ka BP, according  
 441 to Weiss (2016).

442  
443  
444  
445  
446  
447  
448  
449  
450  
451  
452  
453  
454  
455  
456  
457  
458  
459  
460  
461  
462  
463  
464  
465



466  
 467  
 468  
 469  
 470  
 471  
 472  
 473  
 474  
 475  
 476  
 477  
 478  
 479  
 480  
 481  
 482  
 483  
 484  
 485  
 486  
 487  
 488  
 489  
 490  
 491  
 492  
 493  
 494  
 495  
 496  
 497  
 498  
 499  
 500  
 501  
 502  
 503  
 504  
 505  
 506  
 507  
 508  
 509  
 510  
 511

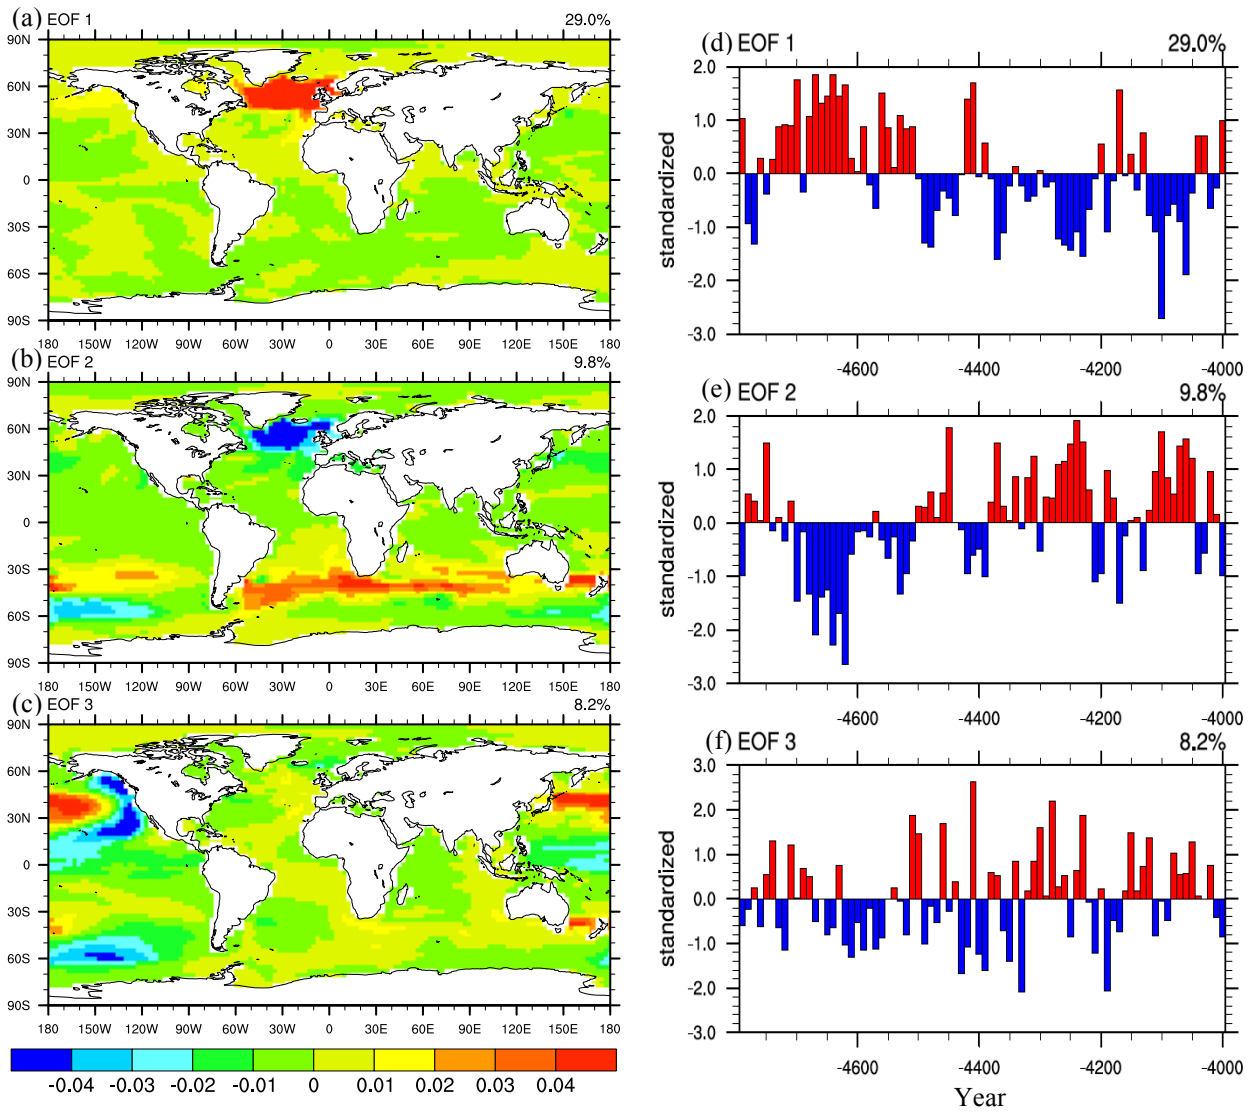

**Figure 3.** The first three patterns (a-c) and principal components (d-f) of rotated EOF modes on the SST over the period 4800-4000ka BP.

512  
513

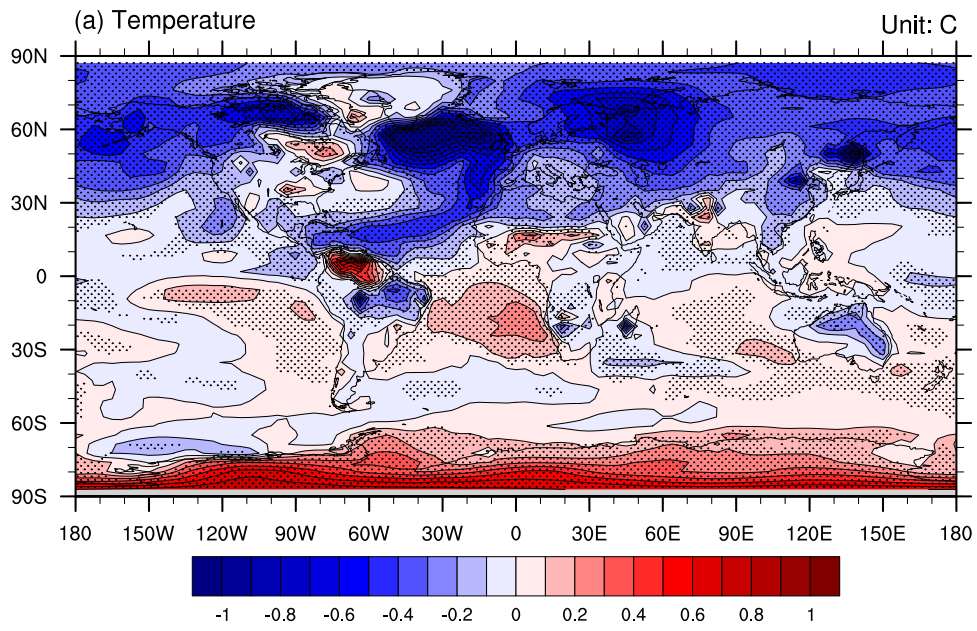

514

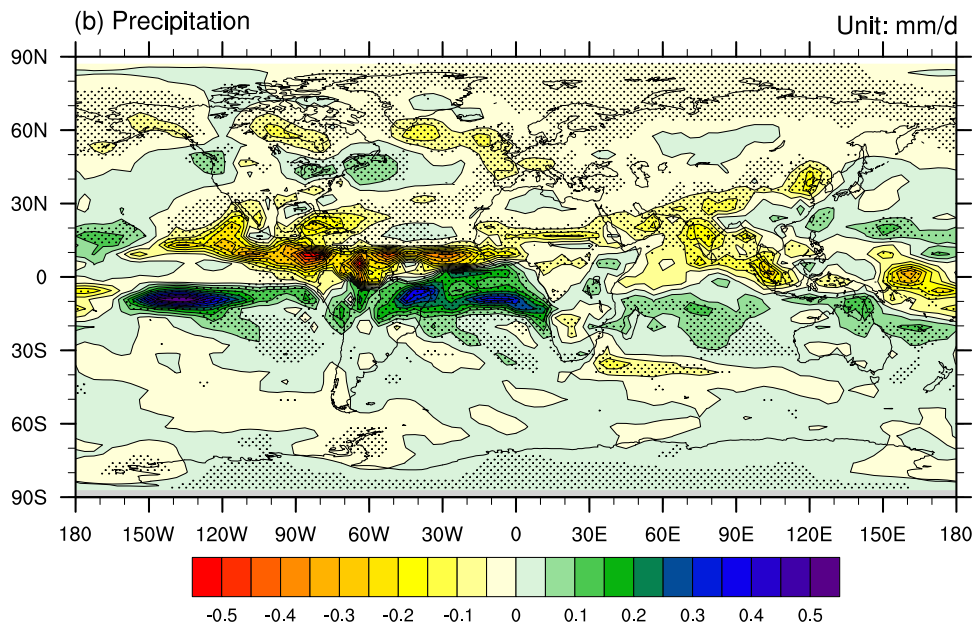

515

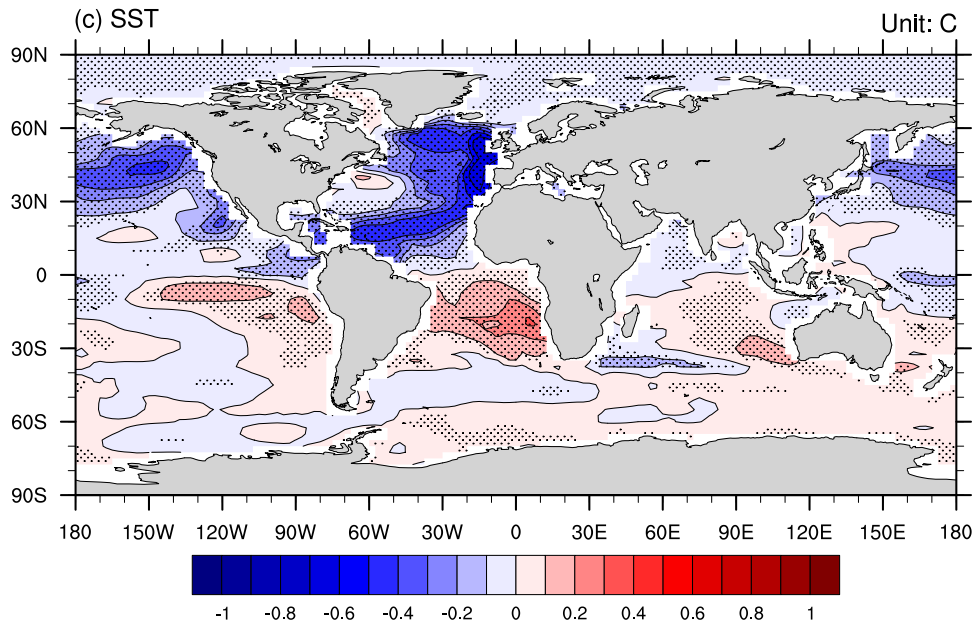

516  
517  
518  
519  
520  
521  
522  
523  
524  
525  
526  
527  
528  
529  
530  
531  
532  
533  
534  
535  
536  
537  
538  
539  
540  
541  
542  
543  
544  
545

**Figure 4.** The changes of (a) surface temperature ( $^{\circ}\text{C}$ ), (b) precipitation (mm/day), and (c) SST ( $^{\circ}\text{C}$ ) after 8.8ka BP (between 8800-8000ka BP and 9200-8800ka BP)

546  
 547  
 548  
 549  
 550  
 551  
 552  
 553  
 554  
 555  
 556  
 557  
 558  
 559  
 560  
 561  
 562  
 563  
 564  
 565  
 566  
 567  
 568  
 569  
 570  
 571  
 572  
 573  
 574  
 575  
 576  
 577  
 578  
 579  
 580  
 581  
 582  
 583  
 584  
 585  
 586  
 587  
 588  
 589  
 590  
 591

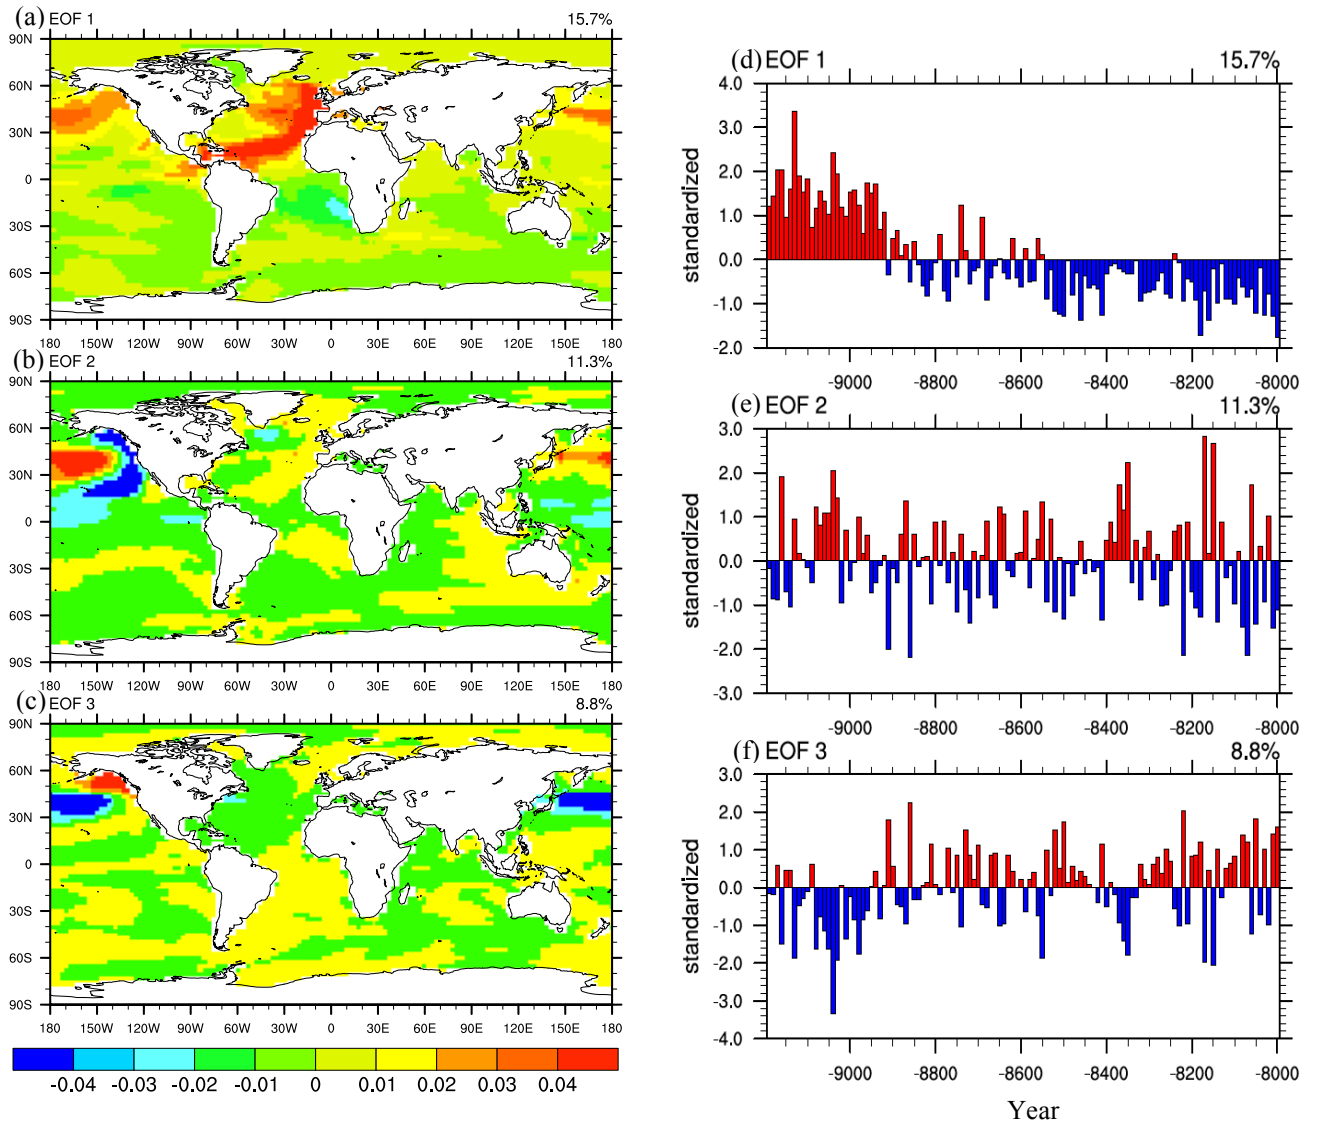

**Figure 5.** The first three patterns (a-c) and principal components (d-f) of rotated EOF modes on the SST over the period 9200-8000ka BP.

592  
593  
594

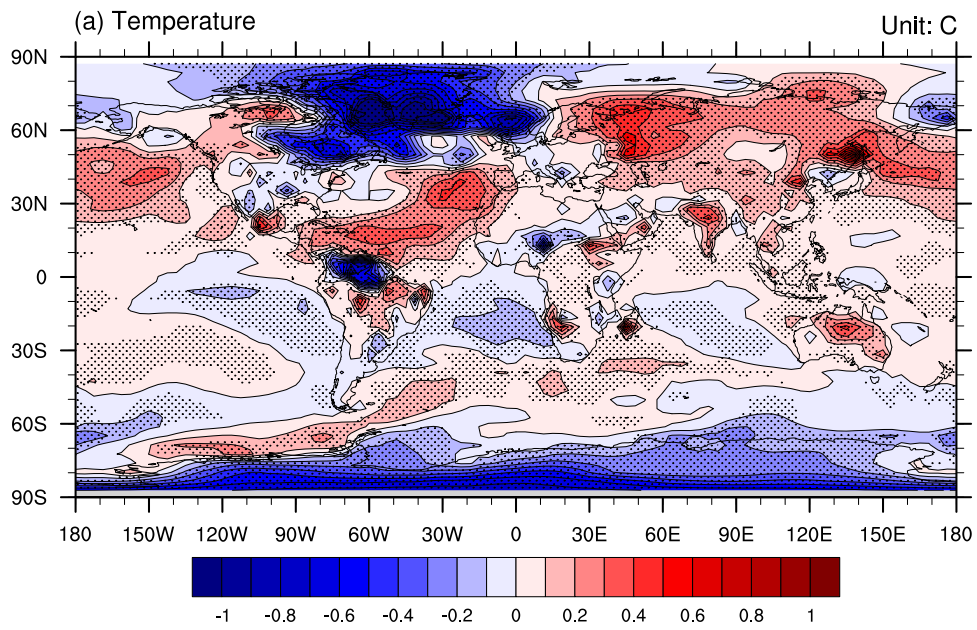

595  
596

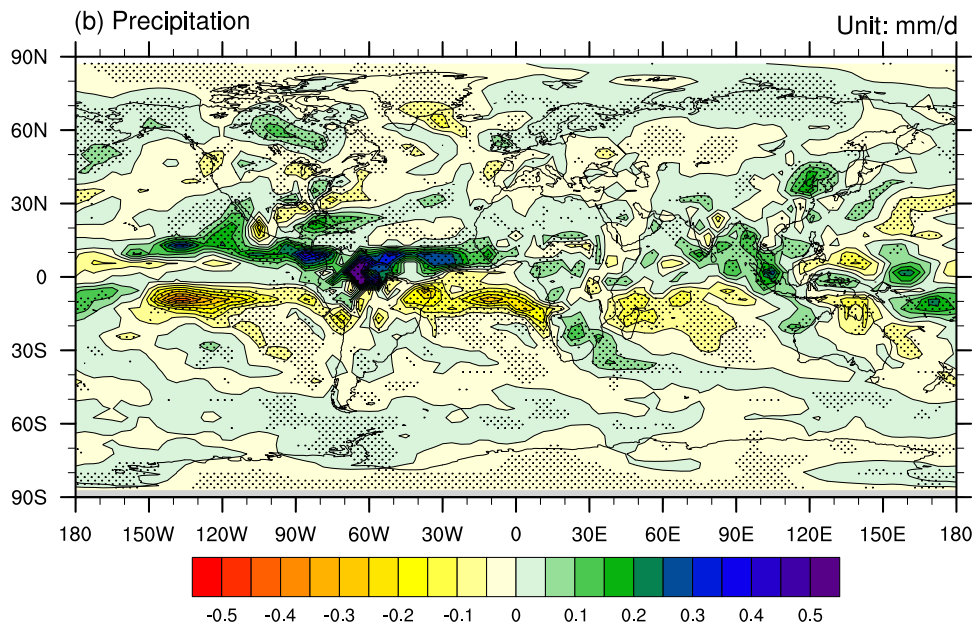

597  
598

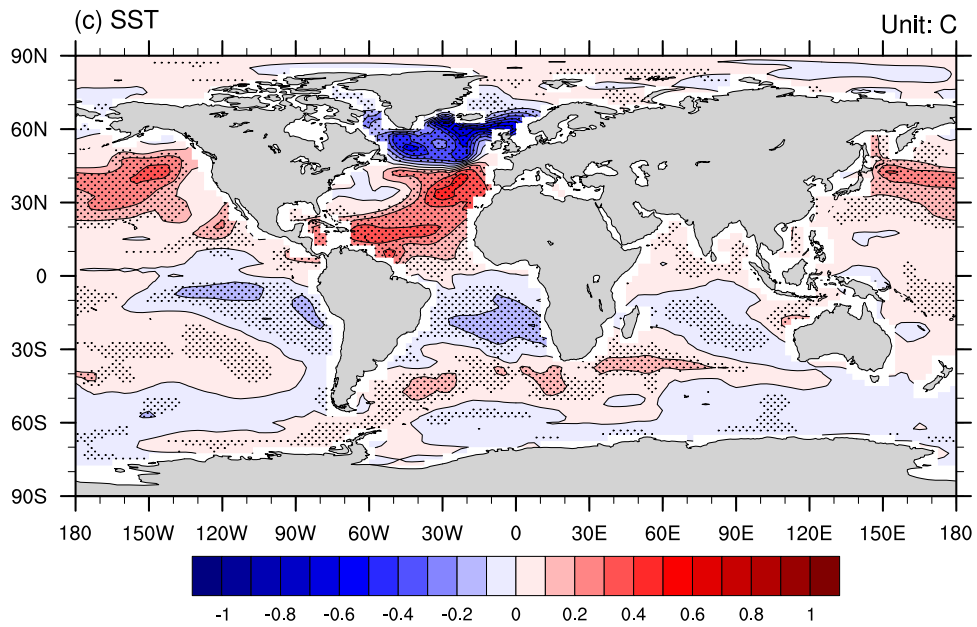

599  
600  
601  
602  
603  
604  
605  
606  
607

**Figure 6.** The differences between changes of (a) surface temperature (°C), (b) precipitation (mm/day), and (c) SST (°C) of the 5<sup>th</sup> millennium BP and 9<sup>th</sup> millennium BP periods shown in Figures 2 and 4.

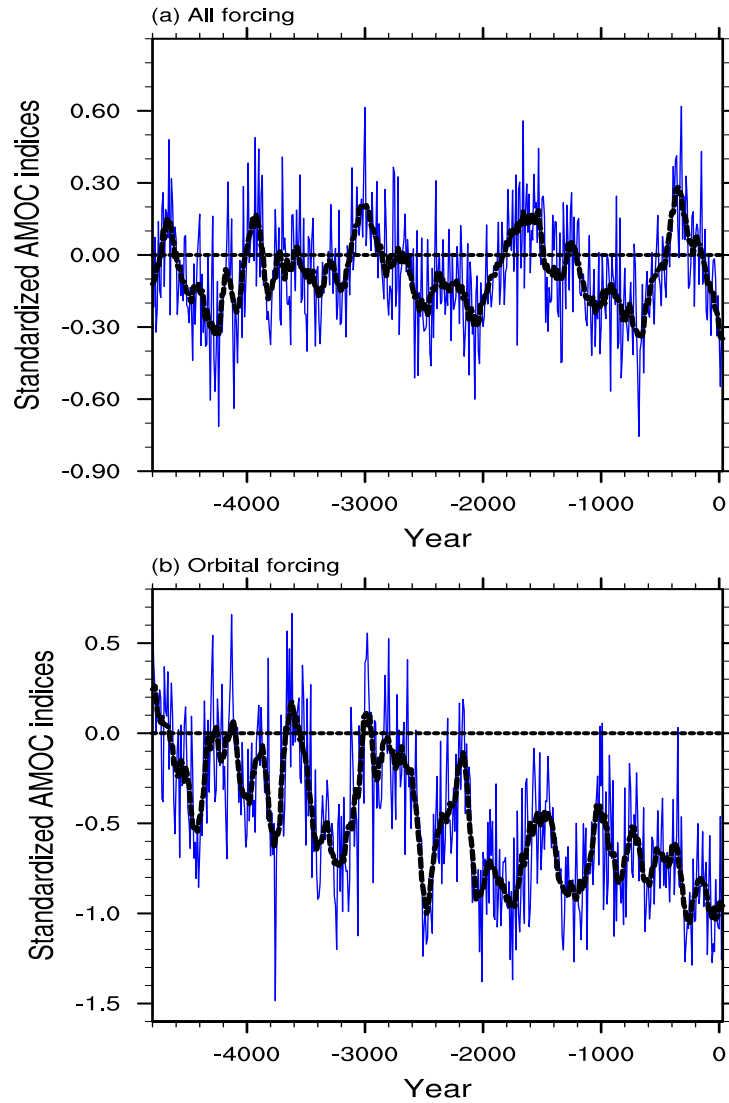

608

609 **Figure 7.** The 10-year running averaged (blue line) and 100-year running averaged (black line)  
 610 time series of AMOC strength, plotted as anomalies from the mean for 4800-4500 years B.P. from  
 611 (a) all-forcing experiment and (b) orbital-forcing experiment. AMOC strength was below the mean  
 612 for 63% of the time in the all-forcing experiment and 87% of the time in the orbital-forcing  
 613 experiment.

614



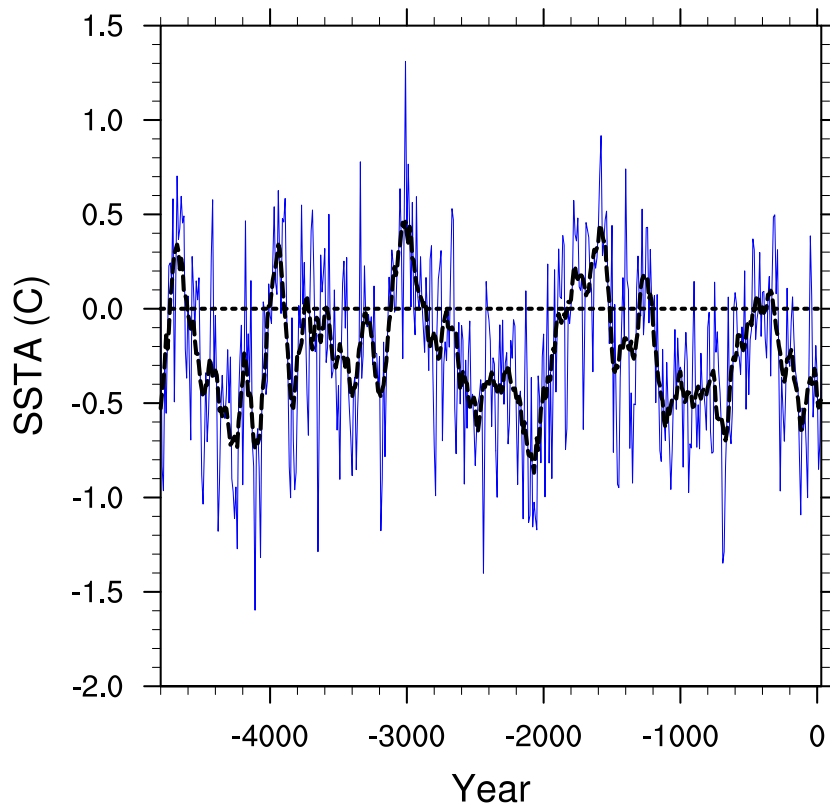

615  
 616  
 617  
 618  
 619  
 620  
 621  
 622

**Figure 8.** The 10-year running averaged (blue line) and 100-year running averaged (black line) SSTs in the area of the North Atlantic with significant negative SST differences between the 5<sup>th</sup> millennium BP and 9<sup>th</sup> millennium BP periods (40-60 °N, 7.5-60 °W) on Figure 2c, plotted as anomalies from the mean for 4800-4500 years B.P. ~69% of the time, temperatures in this region were below the mean.
